# Supplementary material for: Engineering bioinspired bacteria-adhesive clay nanoparticles with a membrane-disruptive property for the treatment of Helicobacter pylori infection
Source: Royal Society of Chemistry journal article supplement (doi:10.1039/c6nr05551f), 2016-01-01
Supplement: c6nr05551f1.pdf [file c6nr05551f1.pdf]

## Electronic Supplementary Information

### Engineering Bioinspired Bacteria-Adhesive Clay Nanoparticles with Membrane-Disruptive Property for Treatment of *Helicobacter pylori* Infection

Yuan Ping<sup>a</sup>, Xiurong Hu<sup>b</sup>, Qi Yao<sup>b</sup>, Qida Hu<sup>c</sup>, Sharouz Amini<sup>a</sup>, Ali Miserez<sup>a,\*</sup> and  
Guping Tang<sup>b,\*</sup>

<sup>a</sup>School of Materials Science and Engineering and Center for Biomimetic Sensor  
Science, Nanyang Technological University, Singapore 639798, Singapore.

<sup>b</sup>Institute of Chemical Biology and Pharmaceutical Chemistry, Zhejiang University,  
Hangzhou 310028, China.

<sup>c</sup>Department of Hepatobiliary and Pancreatic Surgery, The Second Affiliated  
Hospital, Zhejiang University School of Medicine, Hangzhou 310009, China.

\* Corresponding authors: [tangguping@zju.edu.cn](mailto:tangguping@zju.edu.cn); [ali.miserez@ntu.edu.sg](mailto:ali.miserez@ntu.edu.sg)

## Figures

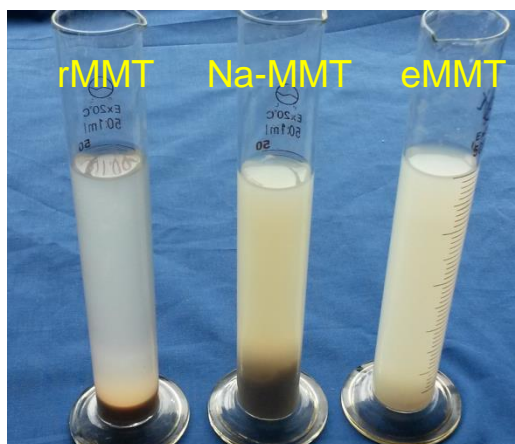

**Figure S1.** Images of unpurified raw MMT (rMMT), sodium MMT (Na-MMT) and exfoliated MMT (eMMT) water dispersion stability. The image was obtained after 24 h of incubation in double distilled water.

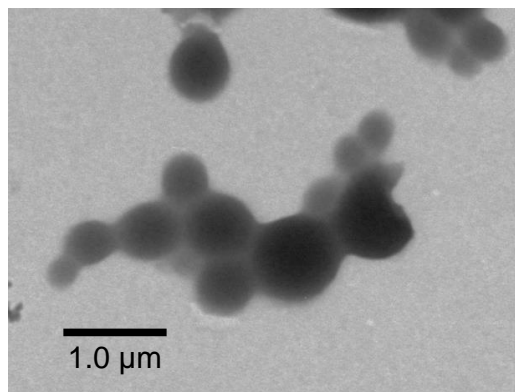

**Figure S2.** TEM micrograph of MTZ-loaded eMMT-IPEI nanoparticles.

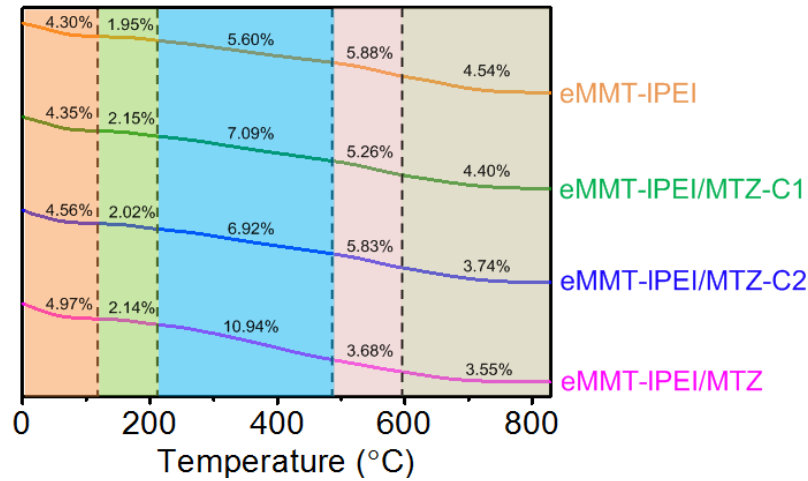

**Figure S3.** TGA analysis of eMMT-IPEI and eMMT-IPEI intercalated with various amount of MTZ. The loading capacity of eMMT-IPEI/MTZ-C1, eMMT-IPEI/MTZ-C2, and eMMT-IPEI/MTZ were 0.87%, 1.14%, and 3.13%, respectively. eMMT-IPEI/MTZ-C1 and eMMT-IPEI/MTZ-C2 were used as controls.

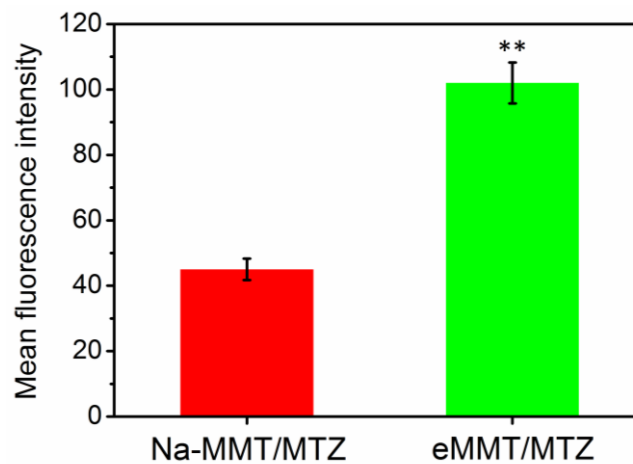

**Figure S4.** Adhesion capacity of sodium MMT (Na-MMT) or exfoliated MMT (MMT) on *H. pylori*. The adhesion was assessed by flow cytometry and was expressed as mean fluorescence intensity. Data represent mean  $\pm$  SD ( $n = 3$ , Student's *t* test, \*\* $P < 0.01$ ).

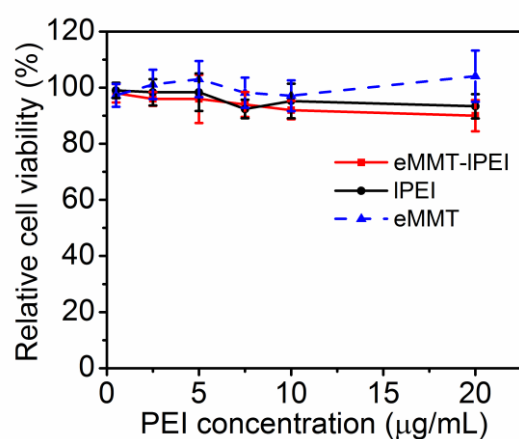

**Figure S5.** HEK-293 relative cell viability after treatment of eMMT-IPEI or IPEI for 24 h. The viability of untreated cells was defined as 100%. Equivalent eMMT (as eMMT-IPEI) was used as a control. The data represent the mean  $\pm$  S.D. ( $n = 5$ ).

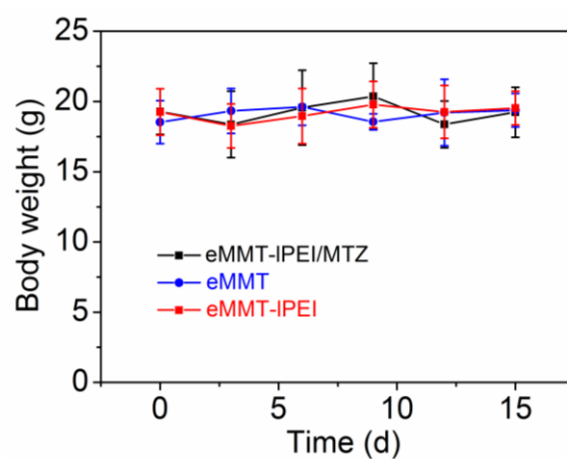

**Figure S6.** Average body weights of mice treated with the different formulations in the BALB/c mouse models. Data represent mean  $\pm$  SD ( $n = 6$ ).
